# Supplementary material
Source: PubMed Central journal article supplement (PMC2872373)
Supplement: 0908341107_pnas.0908341107_SI.pdf [file 0908341107_pnas.0908341107_SI.pdf]

# Supporting Information

Monge et al. 10.1073/pnas.09083411107

## SI Text

**Methods. NO, NO<sub>2</sub>, and HONO detection.** A THERMO 42C chemiluminescence analyzer was used for NO and NO<sub>2</sub> detection. The latter is based on the reaction between nitric oxide (NO) and ozone (O<sub>3</sub>), which produces a characteristic luminescence with an intensity that is linearly proportional to the NO concentration. Nitrogen dioxide is transformed into NO by means of a molybdenum NO<sub>2</sub>-to-NO converter in order to be measured with the chemiluminescent reaction. As HONO is detected by the instrument as NO<sub>2</sub>, a denuder tube (9 cm × 0.95 cm i.d.) containing K<sub>2</sub>CO<sub>3</sub>/Na<sub>2</sub>CO<sub>3</sub> (Fluka) was introduced between the exit of the flow reactor and the detector. The denuder can be either bypassed leading to the detection of NO and NO<sub>2</sub> together with HONO; or it can be switched into the sample line along the experiment. In that case, only NO and NO<sub>2</sub> can be measured after HONO removal from the gas stream. Therefore, the HONO concentration can be obtained as the difference of the detector signal without and with the carbonate denuder in the sampling line (1).

Periodical calibrations of the NO<sub>2</sub> from the bottle were performed using the carbonate denuder. Only 3% of the total NO<sub>2</sub> (and possible contaminants) was trapped in the denuder, this value was then considered in the calculation of the uptake coefficients and products yield.

**Estimation of NO<sub>2</sub> photodissociation.** NO<sub>2</sub> may photodissociate with unit quantum yield in the wavelength region emitted by the lamps (300–420 nm), but its loss in the gas phase is negligible for the residence time of 6 seconds used in our experiments. An estimation of the photolysis rate constant,  $J = 6.52 \times 10^{-4} \text{ s}^{-1}$  gives rise to a loss of 0.4% of the total NO<sub>2</sub> (g).

**Uptake coefficient.** The kinetic behaviour of the NO<sub>2</sub>-soot heterogeneous reaction both in the dark and under irradiation can be well described by assuming a pseudo first-order reaction with respect to the gas-phase NO<sub>2</sub> concentration. The first-order rate constant,  $k_{\text{obs}}$ , derived from the experiment, is related to the geometric uptake coefficient ( $\gamma_g$ ) by

$$\frac{d}{dt} \ln \frac{C_0}{C_i} = k_{\text{obs}} = \frac{\gamma_g \langle c_{\text{NO}_2} \rangle}{2r_{\text{tube}}} \quad [1]$$

where  $r_{\text{tube}}$ ,  $\gamma_g$ ,  $t$ , and  $\langle c_{\text{NO}_2} \rangle$  are the flow-tube radius (0.547 cm), the geometric uptake coefficient, the exposure time, and the NO<sub>2</sub> average molecular velocity, respectively.  $C_0$  is the NO<sub>2</sub> concentration when there is no contact between the soot surface and the reagent, whereas  $C_i$  is the trace gas concentration when the contact with NO<sub>2</sub> is allowed. The uptake coefficient is defined as the fraction of effective collisions between a gas phase reagent and a reactive surface that lead to the loss of the gas phase reagent due to chemical reaction. As  $\gamma_g$  is a mass dependent parameter (Fig. S2), it was transformed into a mass independent one,  $\gamma_{\text{BET}}$ , by taking into account the entire BET surface area of the soot sample instead of the geometric surface area of the glass substrate.

Equation I does not take into account possible diffusion limitations caused by the formation of a radial concentration gradient in the gas phase, which would occur if the loss at the surface is too fast to be recovered with the reagent supply. As a consequence, the Cooney–Kim–Davis method was used to correct the calculated uptake coefficients for gas-phase diffusion (2, 3). The diffusion coefficient,  $D$ , was calculated by using the formula proposed by Fuller et al. (4).

1. Gutzwiller L, George C, Rossler E, Ammann M (2002) Reaction kinetics of NO<sub>2</sub> with resorcinol and 2,7-naphthalenediol in the aqueous phase at different pH. *J Phys Chem A* 106(50):12045–12050.
2. Cooney DO, Kim SS, Davis EJ (1974) Analyses of mass-transfer in hemodialyzers for laminar blood-flow and homogeneous dialysate. *Chem Eng Sci* 29:1731–1738.

3. Murphy DM, Fahey DW (1987) Mathematical treatment of the wall loss of a trace species in denuder and catalytic-converter tubes. *Anal Chem* 59:2753–2759.
4. Fuller EN, Ensley K, Giddings JC (1969) Diffusion of halogenated hydrocarbons in helium. The effect of structure on collision cross sections. *J Phys Chem* 73(11):3679–3685.

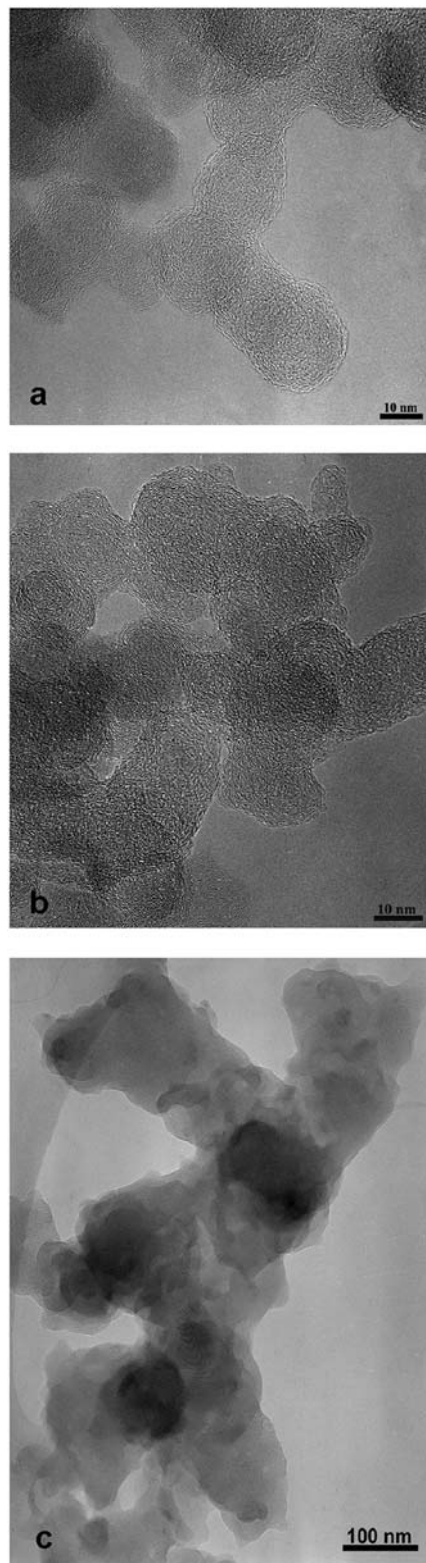

Fig. S1. TEM images of propane soot generated with a lean flame (a), a stoichiometric flame (b), and a rich flame (c).
